# Supplementary material for: Effect of Ecologically Restored Vegetation Roots on the Stability of Shallow Aggregates in Ionic Rare Earth Tailings Piles
Source: MDPI journal article supplement (doi:10.3390/agronomy13040993), 2023-03-28
Supplement: s1 [file s1]

**Supplementary Materials:**

**Table S1.** Biased correlation analysis of tailings containing *Setaria viridis* (\* p<0.05 \*\* p<0.01) .

| Parameter Type  | Relevance               | RLRD     | RLRV     | RDRL     | RDRV   | RVRL    | RVRD    |
|-----------------|-------------------------|----------|----------|----------|--------|---------|---------|
| Weight capacity | Correlation coefficient | 0.998 ** | -0.965 * | -0.489   | -0.467 | 0.955 * | 0.988 * |
|                 | value of p              | 0.002    | 0.035    | 0.072    | 0.067  | 0.045   | 0.012   |
| Water content   | Correlation coefficient | 0.791    | -0.970 * | -0.864   | -0.920 | 0.963 * | 0.864   |
|                 | value of p              | 0.209    | 0.030    | 0.136    | 0.080  | 0.037   | 0.154   |
| Porosity        | Correlation coefficient | 0.955 *  | -0.918   | -0.957 * | -0.844 | 0.947   | 0.966 * |
|                 | value of p              | 0.045    | 0.082    | 0.043    | 0.156  | 0.053   | 0.034   |

**Table S2.** Biased correlation analysis of tailings containing *Cynodon dactylon* (L.) (\* p<0.05 \*\* p<0.01) .

| Parameter Type  | Relevance               | RLRD    | RLRV      | RDRL     | RDRV      | RVRL     | RVRD    |
|-----------------|-------------------------|---------|-----------|----------|-----------|----------|---------|
| Weight capacity | Correlation coefficient | 0.951 * | -0.998 ** | -0.975 * | -0.991 ** | 0.997 ** | 0.971 * |
|                 | value of p              | 0.049   | 0.002     | 0.025    | 0.009     | 0.003    | 0.029   |
| Water content   | Correlation coefficient | 0.901   | -0.975 *  | -0.923   | -0.955 *  | 0.969 *  | 0.930   |
|                 | value of p              | 0.099   | 0.025     | 0.077    | 0.045     | 0.031    | 0.070   |
| Porosity        | Correlation coefficient | 0.989 * | -0.955 *  | -0.989*  | -0.975 *  | 0.957 *  | 0.976 * |
|                 | value of p              | 0.011   | 0.045     | 0.011    | 0.025     | 0.043    | 0.024   |
